# Supplementary material
Source: Springer Nature journal article supplement (https://www.springermedizin.de/resource/supplementary/13063_2010_470_MOESM3_ESM.pdf/9618286)

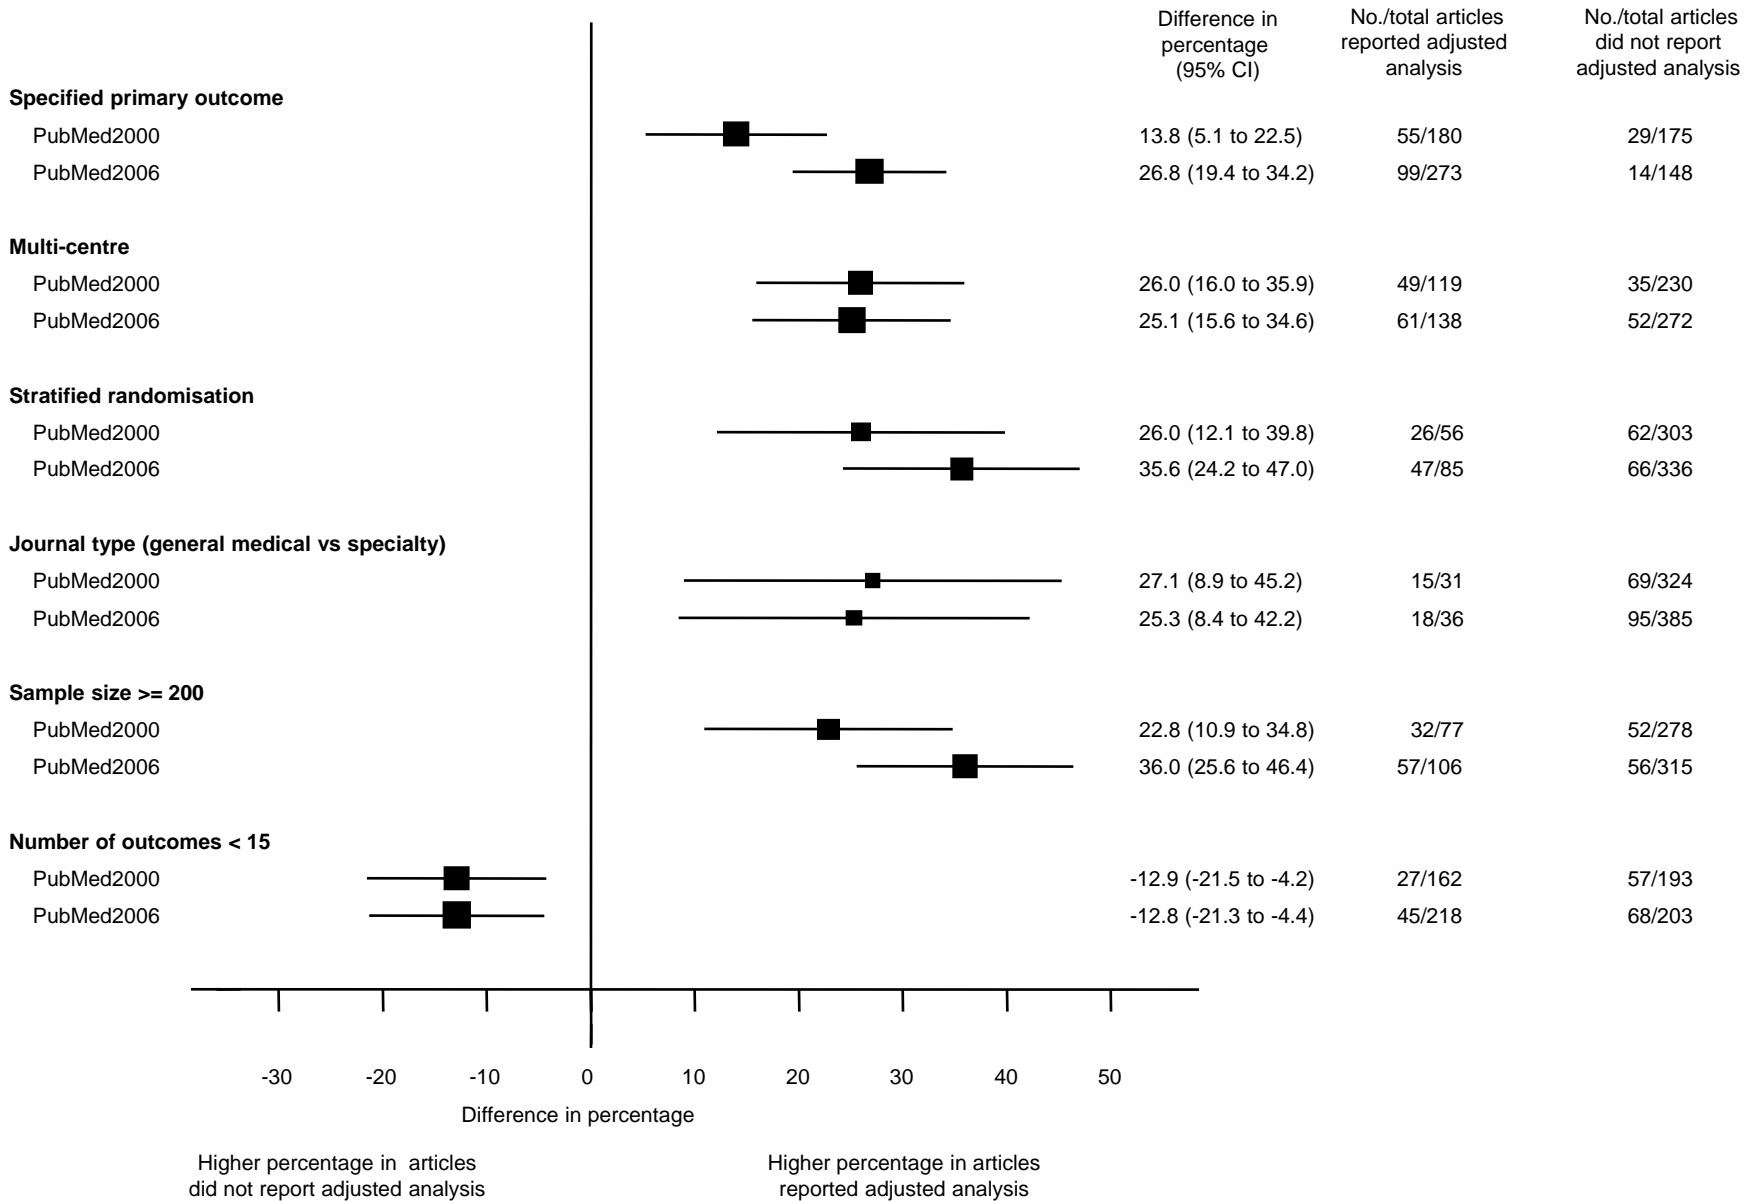

Supplement: MOESM3 [file 9618286]
